# Supplementary material for: Role of ligands in the stability of BnXn and CBn−1Xn (n = 5–10; X = H, F, CN) and their potential as building blocks of electrolytes in lithium ion batteries
Source: Royal Society of Chemistry journal article supplement (doi:10.1039/c7cp02642k), 2017-01-01
Supplement: c7cp02642k1.pdf [file c7cp02642k1.pdf]

## Supporting Information

### **Role of ligands on the stability of $B_nX_n$ and $CB_{n-1}X_n$ ( $n = 5-10$ ; $X = H, F, CN$ ) and their potential as building blocks of electrolytes in lithium ion batteries**

MingMin Zhong,<sup>a,b</sup> Jian Zhou,<sup>b</sup> Hong Fang,<sup>b</sup> Puru Jena<sup>b,1</sup>

<sup>a</sup> *School of Physical Science and Technology, Southwest University, Chongqing 400715, China;*

<sup>b</sup> *Department of Physics Virginia Commonwealth University Richmond, Virginia 23284, USA.*

---

<sup>1</sup> Corresponding author: [pjena@vcu.edu](mailto:pjena@vcu.edu).

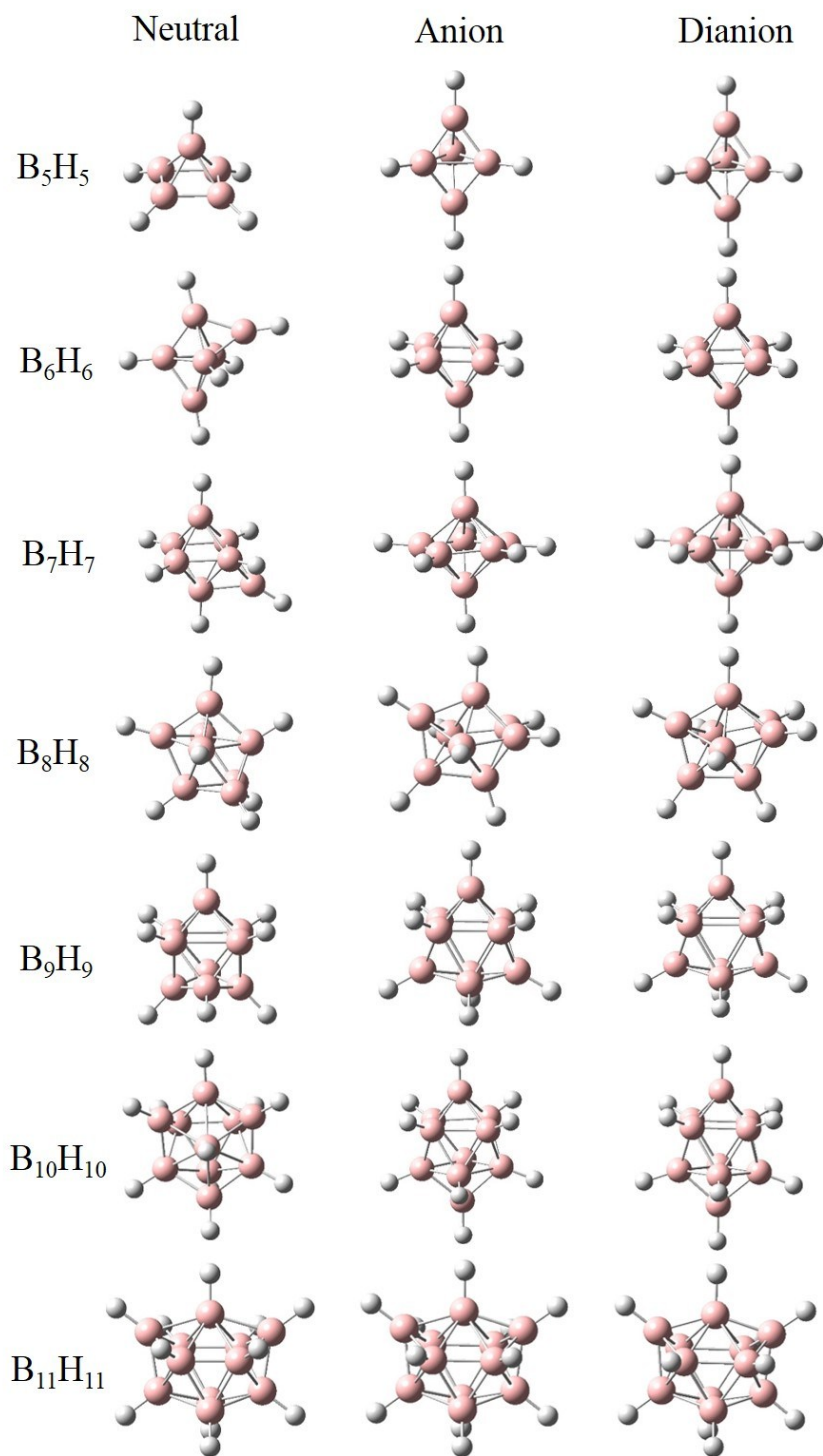

**Fig. S1** The lowest energy structures of neutral, anion and dianion  $B_nH_n$  ( $n = 5-11$ ).

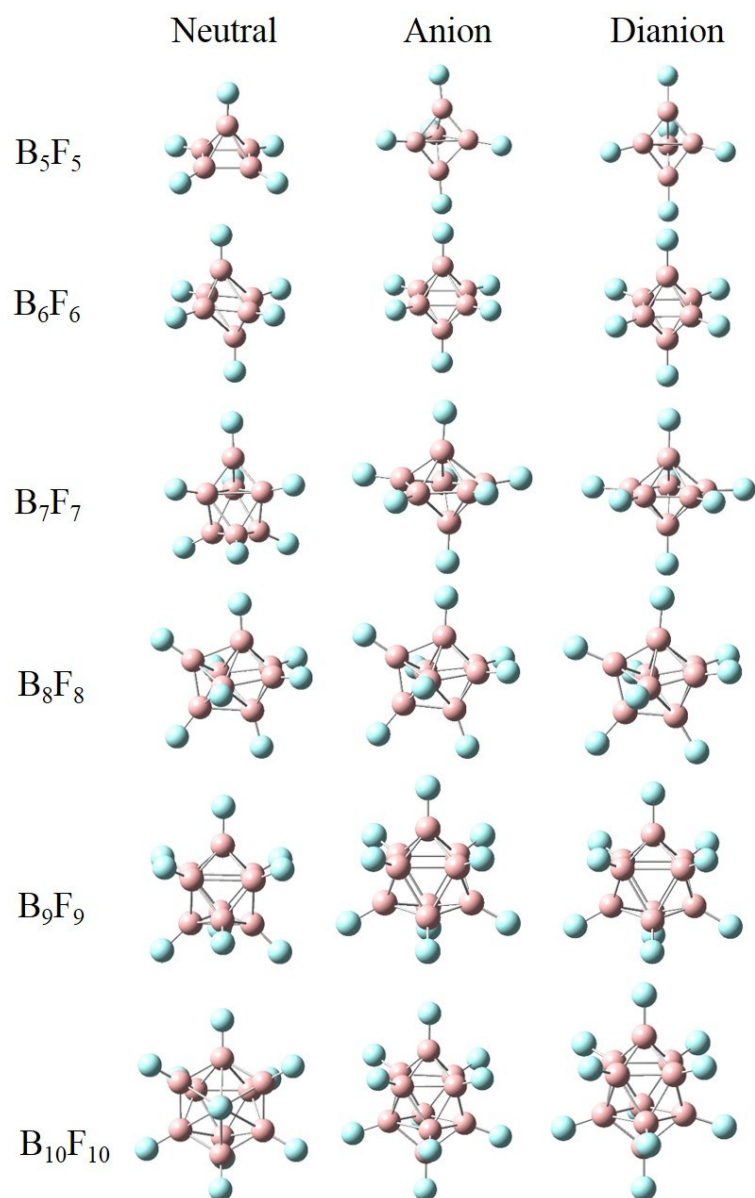

**Fig. S2** The lowest energy structures of neutral, anion and dianion  $B_nF_n$  ( $n = 5-10$ ).

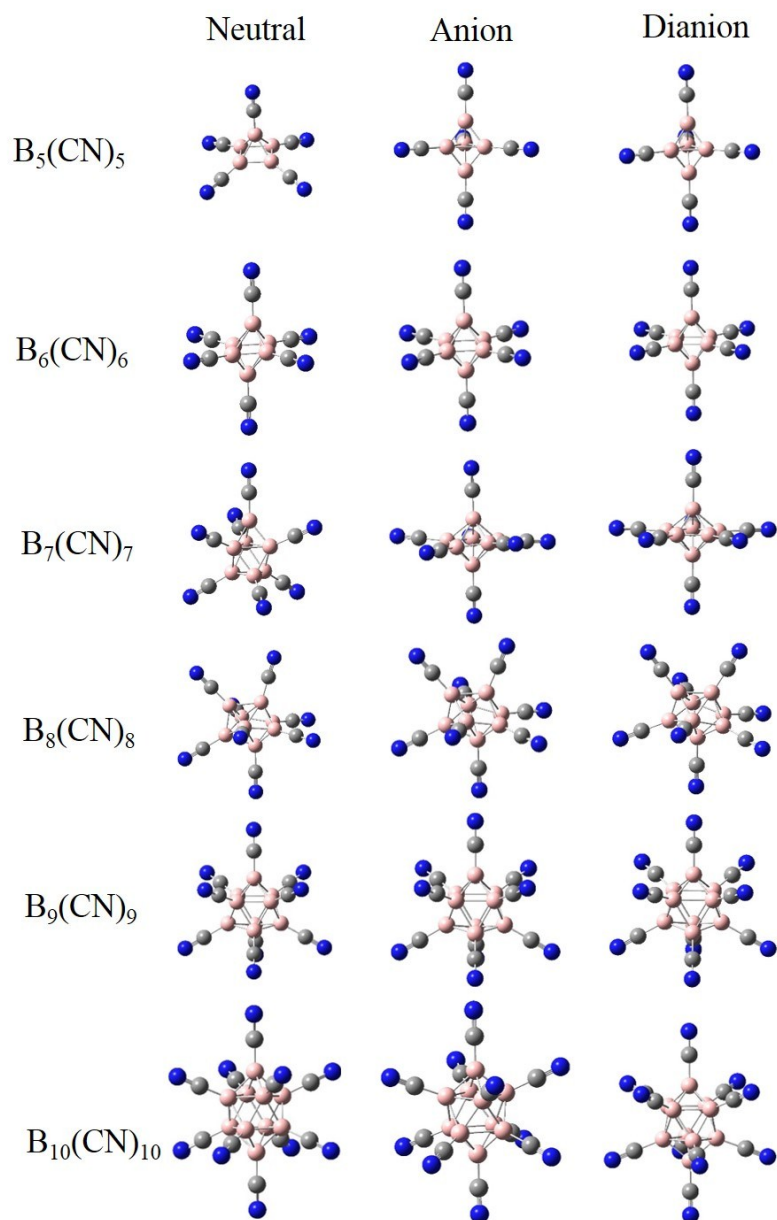

**Fig. S3** The lowest energy structures of neutral, anion and dianion  $B_n(CN)_n$  ( $n = 5-10$ ).

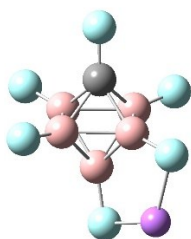

**Fig. S4** The second lowest energy structure of  $LiBC_5F_6$ .
